# Supplementary material for: Implementation of genotype-guided dosing of warfarin with point-of-care genetic testing in three UK clinics: a matched cohort study
Source: BMC Med. 2019 Apr 8;17:76. doi: 10.1186/s12916-019-1308-7 (PMC6454722; doi:10.1186/s12916-019-1308-7)
Supplement: Supplementary file 4 — Study data. (XLSX 66 kb) [file 12916_2019_1308_MOESM4_ESM.xlsx]

## Sheet: implementation
ID	INR	time	Lower	Upper
CCH_1	1.1	0	2	3
CCH_1	1.6	3	2	3
CCH_1	2.2	7	2	3
CCH_1	2.2	10	2	3
CCH_1	1.4	14	2	3
CCH_1	2.7	21	2	3
CCH_1	2.8	31	2	3
CCH_1	1.4	66	2	3
CCH_1	2.6	101	2	3
CCH_2	1.1	0	2	3
CCH_2	1.4	4	2	3
CCH_2	1.9	7	2	3
CCH_2	2	11	2	3
CCH_2	2.1	18	2	3
CCH_2	2.2	25	2	3
CCH_2	2.1	33	2	3
CCH_2	1.8	47	2	3
CCH_2	2	54	2	3
CCH_2	2.6	69	2	3
CCH_2	2.1	82	2	3
CCH_2	2.4	96	2	3
CCH_3	1.1	0	2	3
CCH_3	1.4	3	2	3
CCH_3	1.9	7	2	3
CCH_3	1.8	14	2	3
CCH_3	1.8	24	2	3
CCH_3	1.6	31	2	3
CCH_3	2.2	38	2	3
CCH_3	2.9	45	2	3
CCH_3	3.1	52	2	3
CCH_3	2.8	66	2	3
CCH_3	2.1	93	2	3
CCH_4	1.1	0	2	3
CCH_4	1.3	3	2	3
CCH_4	1.7	7	2	3
CCH_4	1.9	10	2	3
CCH_4	2.3	17	2	3
CCH_4	1.8	24	2	3
CCH_4	2.2	31	2	3
CCH_4	1.7	38	2	3
CCH_4	2.3	45	2	3
CCH_4	2.4	59	2	3
CCH_4	2.4	77	2	3
CCH_4	3	94	2	3
CCH_5	1	0	2	3
CCH_5	1.6	4	2	3
CCH_5	3.1	7	2	3
CCH_5	3.7	11	2	3
CCH_5	3	14	2	3
CCH_5	2.3	18	2	3
CCH_5	2.3	25	2	3
CCH_5	1.9	32	2	3
CCH_5	2.2	41	2	3
CCH_5	1.8	48	2	3
CCH_5	2	55	2	3
CCH_5	2.4	62	2	3
CCH_5	2.6	69	2	3
CCH_5	2.6	83	2	3
CCH_5	2.3	104	2	3
CCH_6	1.1	0	2	3
CCH_6	1.3	3	2	3
CCH_6	1.9	7	2	3
CCH_6	2.9	10	2	3
CCH_6	3.5	17	2	3
CCH_6	3.4	24	2	3
CCH_6	2.9	31	2	3
CCH_6	2.9	38	2	3
CCH_6	2.6	52	2	3
CCH_6	2.9	67	2	3
CCH_6	2.7	85	2	3
CCH_7	1.2	0	2	3
CCH_7	1.3	4	2	3
CCH_7	1.9	7	2	3
CCH_7	2	11	2	3
CCH_7	2.2	20	2	3
CCH_7	1.8	27	2	3
CCH_7	2.1	34	2	3
CCH_7	2.2	41	2	3
CCH_7	2.1	49	2	3
CCH_7	1.6	63	2	3
CCH_7	1.9	70	2	3
CCH_7	2.3	76	2	3
CCH_7	2.2	83	2	3
CCH_7	2.2	97	2	3
CCH_8	1.1	0	2	3
CCH_8	2	3	2	3
CCH_8	3.1	10	2	3
CCH_8	1.8	17	2	3
CCH_8	2	24	2	3
CCH_8	3.4	38	2	3
CCH_8	5.6	45	2	3
CCH_8	2.8	52	2	3
CCH_8	2.8	59	2	3
CCH_8	2.3	73	2	3
CCH_8	5	94	2	3
CCH_9	1	0	2	3
CCH_9	1.3	4	2	3
CCH_9	2.5	7	2	3
CCH_9	4.7	14	2	3
CCH_9	4.4	21	2	3
CCH_9	3.9	28	2	3
CCH_9	2.3	35	2	3
CCH_9	2.7	42	2	3
CCH_9	3.1	56	2	3
CCH_9	2.6	62	2	3
CCH_9	2.5	76	2	3
CCH_9	2	90	2	3
CCH_10	1.1	0	2	3
CCH_10	1.7	3	2	3
CCH_10	2.4	7	2	3
CCH_10	2.3	14	2	3
CCH_10	1.9	28	2	3
CCH_10	2.2	35	2	3
CCH_10	2.5	49	2	3
CCH_10	2.3	63	2	3
CCH_10	2.6	84	2	3
CCH_12	1	0	2	3
CCH_12	1.8	4	2	3
CCH_12	2.2	7	2	3
CCH_12	2	14	2	3
CCH_12	2	21	2	3
CCH_12	1.6	34	2	3
CCH_12	1.8	41	2	3
CCH_12	2.3	48	2	3
CCH_12	1.8	62	2	3
CCH_12	2	69	2	3
CCH_12	2.1	83	2	3
CCH_12	2.2	97	2	3
CCH_13	1	0	2	3
CCH_13	1.6	4	2	3
CCH_13	2.4	7	2	3
CCH_13	3.8	14	2	3
CCH_13	2.4	21	2	3
CCH_13	2.6	28	2	3
CCH_13	2	42	2	3
CCH_13	2.3	49	2	3
CCH_13	2.2	63	2	3
CCH_13	2.5	84	2	3
CCH_14	0.9	0	2	3
CCH_14	1.7	3	2	3
CCH_14	2.4	7	2	3
CCH_14	1.4	10	2	3
CCH_14	1.5	14	2	3
CCH_14	1.6	17	2	3
CCH_14	2	21	2	3
CCH_14	1.9	24	2	3
CCH_14	2.1	28	2	3
CCH_14	2.3	35	2	3
CCH_14	2.3	42	2	3
CCH_14	1.5	56	2	3
CCH_14	1.9	63	2	3
CCH_14	3.8	70	2	3
CCH_14	2.4	77	2	3
CCH_14	2.3	84	2	3
CCH_15	1	0	2	3
CCH_15	1.7	4	2	3
CCH_15	2.6	7	2	3
CCH_15	2.7	11	2	3
CCH_15	2.5	18	2	3
CCH_15	2.1	27	2	3
CCH_15	2.4	41	2	3
CCH_15	2.1	62	2	3
CCH_15	2.3	90	2	3
CCH_16	0.9	0	2	3
CCH_16	1.3	3	2	3
CCH_16	2.1	7	2	3
CCH_16	2.1	10	2	3
CCH_16	2.3	17	2	3
CCH_16	2.3	28	2	3
CCH_16	1.9	42	2	3
CCH_16	1.9	53	2	3
CCH_16	1.9	81	2	3
CCH_16	3.5	95	2	3
CCH_17	1	0	2	3
CCH_17	1.4	4	2	3
CCH_17	3.5	7	2	3
CCH_17	4	11	2	3
CCH_17	2.8	14	2	3
CCH_17	2.9	18	2	3
CCH_17	4.2	25	2	3
CCH_17	2.4	32	2	3
CCH_17	3.8	39	2	3
CCH_17	2.4	46	2	3
CCH_17	2.8	53	2	3
CCH_17	2.3	67	2	3
CCH_17	3.2	92	2	3
CCH_18	1	0	2	3
CCH_18	1.7	3	2	3
CCH_18	3.7	7	2	3
CCH_18	3.2	10	2	3
CCH_18	2.5	17	2	3
CCH_18	2.7	24	2	3
CCH_18	2.6	38	2	3
CCH_18	2.6	59	2	3
CCH_18	2	87	2	3
CCH_19	1	0	2	3
CCH_19	1.7	3	2	3
CCH_19	3.7	7	2	3
CCH_19	3	10	2	3
CCH_19	3.5	14	2	3
CCH_19	2.5	21	2	3
CCH_19	2.4	28	2	3
CCH_19	1.7	42	2	3
CCH_19	2.2	49	2	3
CCH_19	2.3	63	2	3
CCH_19	2.6	84	2	3
CCH_20	1	0	2	3
CCH_20	1.8	4	2	3
CCH_20	2.5	7	2	3
CCH_20	2.3	11	2	3
CCH_20	2.4	14	2	3
CCH_20	2	21	2	3
CCH_20	2.2	34	2	3
CCH_20	1.4	48	2	3
CCH_20	1.7	55	2	3
CCH_20	2	62	2	3
CCH_20	1.7	69	2	3
CCH_20	1.9	76	2	3
CCH_20	2.2	90	2	3
CCH_21	1	0	2	3
CCH_21	1.7	4	2	3
CCH_21	2.4	7	2	3
CCH_21	3	11	2	3
CCH_21	3.9	18	2	3
CCH_21	2.8	25	2	3
CCH_21	2	32	2	3
CCH_21	2.5	42	2	3
CCH_21	2.9	49	2	3
CCH_21	2.5	70	2	3
CCH_21	3.4	96	2	3
CCH_22	0.1	0	2	3
CCH_22	1.3	3	2	3
CCH_22	2.2	7	2	3
CCH_22	1.9	10	2	3
CCH_22	3.8	17	2	3
CCH_22	3.6	24	2	3
CCH_22	1.1	35	2	3
CCH_22	1.1	37	2	3
CCH_22	1.1	39	2	3
CCH_22	1.7	45	2	3
CCH_22	2.1	52	2	3
CCH_22	1.8	59	2	3
CCH_22	1.8	66	2	3
CCH_22	2.5	83	2	3
CCH_22	1.9	88	2	3
CCH_25	1.2	0	2	3
CCH_25	1.5	4	2	3
CCH_25	2.1	7	2	3
CCH_25	3.2	14	2	3
CCH_25	4.5	21	2	3
CCH_25	2.8	28	2	3
CCH_25	2.2	35	2	3
CCH_25	2.7	42	2	3
CCH_25	2.5	49	2	3
CCH_25	2.1	64	2	3
CCH_25	1.9	85	2	3
CCH_26	1.1	0	2	3
CCH_26	2.3	3	2	3
CCH_26	3	7	2	3
CCH_26	2.9	10	2	3
CCH_26	1.9	17	2	3
CCH_26	2.3	24	2	3
CCH_26	2	36	2	3
CCH_26	1.9	50	2	3
CCH_26	2.3	57	2	3
CCH_26	2.1	72	2	3
CCH_26	1.6	93	2	3
CCH_29	1	0	2	3
CCH_29	1.3	3	2	3
CCH_29	2	7	2	3
CCH_29	1.8	10	2	3
CCH_29	2.4	17	2	3
CCH_29	2	24	2	3
CCH_29	2.2	31	2	3
CCH_29	2	37	2	3
CCH_29	1.8	44	2	3
CCH_29	1.8	45	2	3
CCH_29	2.3	51	2	3
CCH_29	2.3	72	2	3
CCH_29	1.7	100	2	3
CCH_30	1	0	2	3
CCH_30	1	3	2	3
CCH_30	1.1	7	2	3
CCH_30	1.1	10	2	3
CCH_30	1.2	14	2	3
CCH_30	1.3	17	2	3
CCH_30	1.7	21	2	3
CCH_30	2	24	2	3
CCH_30	1.7	28	2	3
CCH_30	2.1	35	2	3
CCH_30	2	49	2	3
CCH_30	2.8	59	2	3
CCH_30	1.7	72	2	3
CCH_30	2.1	77	2	3
CCH_30	1.8	84	2	3
CCH_31	1	0	2	3
CCH_31	1.9	3	2	3
CCH_31	3.5	7	2	3
CCH_31	2.1	14	2	3
CCH_31	2.3	21	2	3
CCH_31	2.6	31	2	3
CCH_31	1.6	43	2	3
CCH_31	2	57	2	3
CCH_31	1.4	71	2	3
CCH_31	2.2	78	2	3
CCH_31	1.6	92	2	3
CCH_32	1	0	2	3
CCH_32	1.8	4	2	3
CCH_32	2.1	7	2	3
CCH_32	2.1	14	2	3
CCH_32	3.2	21	2	3
CCH_32	2.5	32	2	3
CCH_32	2	41	2	3
CCH_32	2.1	49	2	3
CCH_32	2.8	63	2	3
CCH_32	2.1	77	2	3
CCH_32	2.2	91	2	3
CCH_33	1	0	2	3
CCH_33	1.5	3	2	3
CCH_33	2.8	7	2	3
CCH_33	2	14	2	3
CCH_33	1.6	21	2	3
CCH_33	2.5	28	2	3
CCH_33	3	38	2	3
CCH_33	2.4	45	2	3
CCH_33	2.4	52	2	3
CCH_33	3.3	66	2	3
CCH_33	2.3	73	2	3
CCH_33	2.4	87	2	3
CCH_34	1	0	2	3
CCH_34	2.5	4	2	3
CCH_34	3.8	7	2	3
CCH_34	3	14	2	3
CCH_34	2.5	21	2	3
CCH_34	2.3	35	2	3
CCH_34	2.7	48	2	3
CCH_34	3.1	60	2	3
CCH_34	2.1	67	2	3
CCH_34	3.1	81	2	3
CCH_34	3.2	83	2	3
CCH_34	3.2	84	2	3
CCH_35	1.1	0	2	3
CCH_35	1.8	3	2	3
CCH_35	2.7	7	2	3
CCH_35	2.7	10	2	3
CCH_35	2.8	17	2	3
CCH_35	2.4	24	2	3
CCH_35	2.6	38	2	3
CCH_35	2.3	58	2	3
CCH_35	2.9	79	2	3
CCH_35	2.3	93	2	3
CCH_36	1	0	2	3
CCH_36	1.7	4	2	3
CCH_36	2.7	7	2	3
CCH_36	2.7	11	2	3
CCH_36	2.1	18	2	3
CCH_36	2	25	2	3
CCH_36	1.9	32	2	3
CCH_36	2.1	39	2	3
CCH_36	2.4	46	2	3
CCH_36	2.4	53	2	3
CCH_36	2.5	60	2	3
CCH_36	2.5	67	2	3
CCH_36	2.2	81	2	3
CCH_36	2	102	2	3
CCH_37	1	0	2	3
CCH_37	1.4	4	2	3
CCH_37	1.9	7	2	3
CCH_37	3.3	11	2	3
CCH_37	2.4	18	2	3
CCH_37	1.8	25	2	3
CCH_37	2.4	32	2	3
CCH_37	2	46	2	3
CCH_37	2.3	61	2	3
CCH_37	1.8	82	2	3
CCH_37	1.8	89	2	3
CCH_38	1	0	2	3
CCH_38	1.5	3	2	3
CCH_38	2.4	7	2	3
CCH_38	2.7	14	2	3
CCH_38	2.6	21	2	3
CCH_38	2.2	28	2	3
CCH_38	2.2	35	2	3
CCH_38	2.2	49	2	3
CCH_38	2.4	56	2	3
CCH_38	2.5	63	2	3
CCH_38	2	84	2	3
CCH_38	2.3	98	2	3
CCH_39	1	0	2	3
CCH_39	1.3	3	2	3
CCH_39	2.1	7	2	3
CCH_39	2.3	10	2	3
CCH_39	2.5	17	2	3
CCH_39	2.3	30	2	3
CCH_39	2.1	51	2	3
CCH_39	2.9	65	2	3
CCH_39	2.2	100	2	3
CCH_40	1.1	0	2	3
CCH_40	2.1	4	2	3
CCH_40	3.9	7	2	3
CCH_40	3.3	11	2	3
CCH_40	4.1	14	2	3
CCH_40	3	21	2	3
CCH_40	1.4	28	2	3
CCH_40	2.5	35	2	3
CCH_40	2.9	42	2	3
CCH_40	2.7	54	2	3
CCH_40	2.3	68	2	3
CCH_40	4.1	82	2	3
CCH_40	2.1	89	2	3
CCH_41	1	0	2	3
CCH_41	1.4	3	2	3
CCH_41	2.3	7	2	3
CCH_41	2.3	10	2	3
CCH_41	3.1	14	2	3
CCH_41	2.8	22	2	3
CCH_41	2.8	28	2	3
CCH_41	2.2	42	2	3
CCH_41	2.2	56	2	3
CCH_41	2.3	78	2	3
CCH_41	2.4	106	2	3
CCH_42	0.9	0	2	3
CCH_42	1.1	3	2	3
CCH_42	1.4	7	2	3
CCH_42	1.7	10	2	3
CCH_42	2.3	14	2	3
CCH_42	2.3	17	2	3
CCH_42	2.6	24	2	3
CCH_42	1.8	37	2	3
CCH_42	2.9	44	2	3
CCH_42	2.5	51	2	3
CCH_42	3.5	60	2	3
CCH_42	2.9	73	2	3
CCH_42	3.8	80	2	3
CCH_42	2.6	87	2	3
CCH_43	1	0	2	3
CCH_43	2	4	2	3
CCH_43	2.9	7	2	3
CCH_43	2.5	11	2	3
CCH_43	2.4	18	2	3
CCH_43	1.8	28	2	3
CCH_43	2	35	2	3
CCH_43	2.5	46	2	3
CCH_43	2.7	60	2	3
CCH_43	0.1	70	2	3
CCH_43	0.1	71	2	3
CCH_43	0.1	72	2	3
CCH_43	5.1	73	2	3
CCH_43	0.1	75	2	3
CCH_43	4.2	76	2	3
CCH_43	2	78	2	3
CCH_43	1	81	2	3
CCH_43	1.2	82	2	3
CCH_43	1.9	89	2	3
CCH_44	1	0	2	3
CCH_44	1.5	4	2	3
CCH_44	2.4	7	2	3
CCH_44	3.4	11	2	3
CCH_44	3.3	18	2	3
CCH_44	3	25	2	3
CCH_44	2.8	34	2	3
CCH_44	1.7	48	2	3
CCH_44	2.8	54	2	3
CCH_44	2.5	68	2	3
CCH_44	2.2	90	2	3
CCH_45	1.1	0	2	3
CCH_45	1.2	17	2	3
CCH_45	1.6	21	2	3
CCH_45	1.6	24	2	3
CCH_45	2.4	31	2	3
CCH_45	2.4	42	2	3
CCH_45	2.6	56	2	3
CCH_45	2.7	77	2	3
CCH_45	3	105	2	3
CCH_46	1.1	0	2	3
CCH_46	1.5	4	2	3
CCH_46	2.2	7	2	3
CCH_46	2.5	14	2	3
CCH_46	5.2	21	2	3
CCH_46	2.1	28	2	3
CCH_46	2.1	35	2	3
CCH_46	2.3	46	2	3
CCH_46	1.9	60	2	3
CCH_46	1.6	74	2	3
CCH_46	2.4	88	2	3
CCH_47	1.1	0	2	3
CCH_47	2.1	4	2	3
CCH_47	2.4	7	2	3
CCH_47	2.9	11	2	3
CCH_47	2.6	18	2	3
CCH_47	2.5	25	2	3
CCH_47	2.1	39	2	3
CCH_47	2.2	53	2	3
CCH_47	2.2	67	2	3
CCH_47	2.5	88	2	3
CCH_48	1	0	2	3
CCH_48	1.6	4	2	3
CCH_48	2.6	7	2	3
CCH_48	2.7	11	2	3
CCH_48	3	18	2	3
CCH_48	2.8	27	2	3
CCH_48	2.2	41	2	3
CCH_48	2.3	55	2	3
CCH_48	1.6	76	2	3
CCH_48	2.2	83	2	3
CCH_48	2.1	97	2	3
CCH_49	1	0	2	3
CCH_49	1.4	4	2	3
CCH_49	2.1	7	2	3
CCH_49	2.6	11	2	3
CCH_49	3.3	18	2	3
CCH_49	3.3	25	2	3
CCH_49	3.3	32	2	3
CCH_49	3.1	39	2	3
CCH_49	2.8	46	2	3
CCH_49	2.3	60	2	3
CCH_49	2.6	74	2	3
CCH_49	2.3	88	2	3
CCH_50	1	0	2	3
CCH_50	1.8	3	2	3
CCH_50	3.2	7	2	3
CCH_50	2.6	10	2	3
CCH_50	2.5	17	2	3
CCH_50	2.1	31	2	3
CCH_50	1.9	44	2	3
CCH_50	1.7	52	2	3
CCH_50	2.9	59	2	3
CCH_50	2.6	66	2	3
CCH_50	2.2	80	2	3
CCH_50	2.2	94	2	3
CCH_53	1	0	2	3
CCH_53	1.4	4	2	3
CCH_53	2.3	18	2	3
CCH_53	2.1	25	2	3
CCH_53	2	35	2	3
CCH_53	1.7	48	2	3
CCH_53	1.9	55	2	3
CCH_53	2.4	67	2	3
CCH_53	2	76	2	3
CCH_53	2.1	83	2	3
CCH_53	2.9	98	2	3
CCH_54	1.2	0	2	3
CCH_54	1.7	3	2	3
CCH_54	3	7	2	3
CCH_54	3.1	10	2	3
CCH_54	1.9	17	2	3
CCH_54	2.1	24	2	3
CCH_54	1.7	36	2	3
CCH_54	1.8	42	2	3
CCH_54	2.5	50	2	3
CCH_54	2.7	56	2	3
CCH_54	2.9	70	2	3
CCH_54	1.8	81	2	3
CCH_54	1.8	101	2	3
CCH_55	1.1	0	2	3
CCH_55	1.3	4	2	3
CCH_55	1.6	7	2	3
CCH_55	3	11	2	3
CCH_55	3.5	18	2	3
CCH_55	2.7	25	2	3
CCH_55	2.5	39	2	3
CCH_55	3.1	48	2	3
CCH_55	2	56	2	3
CCH_55	2.1	62	2	3
CCH_55	1.7	69	2	3
CCH_55	2.2	76	2	3
CCH_55	2.2	90	2	3
CCH_56	0.9	0	2	3
CCH_56	1.6	3	2	3
CCH_56	2.3	7	2	3
CCH_56	2.5	14	2	3
CCH_56	1.9	28	2	3
CCH_56	1.8	42	2	3
CCH_56	1.7	49	2	3
CCH_56	2	56	2	3
CCH_56	2.1	60	2	3
CCH_56	2.2	70	2	3
CCH_56	2	77	2	3
CCH_56	2.2	91	2	3
CCH_58	1.1	0	2	3
CCH_58	1.4	4	2	3
CCH_58	1.7	7	2	3
CCH_58	3	14	2	3
CCH_58	1.7	21	2	3
CCH_58	2	28	2	3
CCH_58	2.3	35	2	3
CCH_58	2.6	49	2	3
CCH_58	2.6	63	2	3
CCH_58	2.2	84	2	3
CCH_61	1	0	2	3
CCH_61	2.1	4	2	3
CCH_61	3.4	7	2	3
CCH_61	2.2	14	2	3
CCH_61	1.6	21	2	3
CCH_61	2	26	2	3
CCH_61	2.2	32	2	3
CCH_61	1.7	42	2	3
CCH_61	1.7	49	2	3
CCH_61	2.2	56	2	3
CCH_61	1.8	70	2	3
CCH_61	1.8	77	2	3
CCH_61	2	84	2	3
CCH_60	1	0	2	3
CCH_60	1.5	3	2	3
CCH_60	2.5	9	2	3
CCH_60	1.5	14	2	3
CCH_60	2	21	2	3
CCH_60	2.5	28	2	3
CCH_60	3.5	38	2	3
CCH_60	1.8	45	2	3
CCH_60	2.4	52	2	3
CCH_60	2.3	59	2	3
CCH_60	1.3	70	2	3
CCH_60	1.3	73	2	3
CCH_60	2.1	80	2	3
CCH_60	1.7	91	2	3
CCH_63	1	0	2	3
CCH_63	1.3	3	2	3
CCH_63	2.1	7	2	3
CCH_63	2.2	14	2	3
CCH_63	2.2	24	2	3
CCH_63	2.4	31	2	3
CCH_63	2.2	49	2	3
CCH_63	2.1	70	2	3
CCH_63	1.8	91	2	3
CCH_64	1.1	0	2	3
CCH_64	3.2	4	2	3
CCH_64	3.3	7	2	3
CCH_64	2.3	11	2	3
CCH_64	2.3	14	2	3
CCH_64	2.3	21	2	3
CCH_64	2.5	25	2	3
CCH_64	2.3	32	2	3
CCH_64	2.7	39	2	3
CCH_64	2.5	42	2	3
CCH_64	2.5	49	2	3
CCH_64	2.1	63	2	3
CCH_64	2	70	2	3
CCH_64	2.3	77	2	3
CCH_64	1.8	91	2	3
CCH_65	1	0	2	3
CCH_65	2	4	2	3
CCH_65	2.6	7	2	3
CCH_65	3.2	14	2	3
CCH_65	2.9	25	2	3
CCH_65	1.8	35	2	3
CCH_65	1.8	42	2	3
CCH_65	1.8	60	2	3
CCH_65	1.6	67	2	3
CCH_65	1.6	84	2	3
CCH_66	1.1	0	2	3
CCH_66	1.9	3	2	3
CCH_66	3.4	7	2	3
CCH_66	3.1	14	2	3
CCH_66	2.9	21	2	3
CCH_66	2.8	28	2	3
CCH_66	2.9	35	2	3
CCH_66	4	42	2	3
CCH_66	5.1	49	2	3
CCH_66	2.1	56	2	3
CCH_66	2	63	2	3
CCH_66	1.9	73	2	3
CCH_66	2.1	84	2	3
CCH_68	1	0	2	3
CCH_68	1.5	4	2	3
CCH_68	2.6	7	2	3
CCH_68	2.7	11	2	3
CCH_68	3.4	18	2	3
CCH_68	2.6	27	2	3
CCH_68	2	34	2	3
CCH_68	1.8	41	2	3
CCH_68	1.7	48	2	3
CCH_68	1.9	55	2	3
CCH_68	1.7	62	2	3
CCH_68	2	69	2	3
CCH_68	1.8	76	2	3
CCH_68	2.1	84	2	3
CCH_67	1.1	0	2	3
CCH_67	1.2	4	2	3
CCH_67	1.6	7	2	3
CCH_67	2.2	11	2	3
CCH_67	2.8	14	2	3
CCH_67	4.4	18	2	3
CCH_67	3.6	25	2	3
CCH_67	2.8	32	2	3
CCH_67	2.8	39	2	3
CCH_67	2.2	48	2	3
CCH_67	3.1	54	2	3
CCH_67	3.1	60	2	3
CCH_67	2.7	67	2	3
CCH_67	2.5	70	2	3
CCH_67	3.4	75	2	3
CCH_67	2.2	81	2	3
CCH_67	1.3	86	2	3
CCH_70	1.1	0	2	3
CCH_70	2.4	31	2	3
CCH_70	3.8	36	2	3
CCH_70	2.4	42	2	3
CCH_70	1.4	49	2	3
CCH_70	2	56	2	3
CCH_70	1.8	63	2	3
CCH_70	3.1	70	2	3
CCH_70	3.5	79	2	3
CCH_70	4.8	86	2	3
CCH_71	1.1	0	2	3
CCH_71	1.4	4	2	3
CCH_71	2	7	2	3
CCH_71	2.5	11	2	3
CCH_71	3	18	2	3
CCH_71	3.1	25	2	3
CCH_71	1.6	35	2	3
CCH_71	1.7	42	2	3
CCH_71	2.3	49	2	3
CCH_71	3.1	63	2	3
CCH_71	2.3	77	2	3
CCH_71	2.9	98	2	3
WHH_44	1.1	0	2	3
WHH_44	2.6	6	2	3
WHH_44	3.1	13	2	3
WHH_44	2.2	20	2	3
WHH_44	1.5	34	2	3
WHH_44	1.7	41	2	3
WHH_44	1.5	55	2	3
WHH_44	1.4	62	2	3
WHH_44	2.3	69	2	3
WHH_44	2.5	76	2	3
WHH_44	2	90	2	3
WHH_45	1.2	0	2	3
WHH_45	1.9	3	2	3
WHH_45	2.6	14	2	3
WHH_45	4.1	21	2	3
WHH_45	1.5	35	2	3
WHH_45	2.7	42	2	3
WHH_45	2.1	56	2	3
WHH_45	2	84	2	3
WHH_46	1.1	0	2	3
WHH_46	1.5	9	2	3
WHH_46	2.6	12	2	3
WHH_46	3.4	19	2	3
WHH_46	1.9	26	2	3
WHH_46	1.6	40	2	3
WHH_46	2.1	57	2	3
WHH_46	1.7	82	2	3
WHH_46	2.3	100	2	3
WHH_47	1.1	0	2	3
WHH_47	1.4	3	2	3
WHH_47	1.8	7	2	3
WHH_47	1.7	9	2	3
WHH_47	3.5	11	2	3
WHH_47	3.4	16	2	3
WHH_47	3.3	23	2	3
WHH_47	2	30	2	3
WHH_47	2.4	51	2	3
WHH_47	1.1	66	2	3
WHH_47	1.4	73	2	3
WHH_47	1.9	80	2	3
WHH_47	3	86	2	3
WHH_48	1	0	2	3
WHH_48	4	5	2	3
WHH_48	2.3	10	2	3
WHH_48	2.2	13	2	3
WHH_48	1.8	20	2	3
WHH_48	1.4	27	2	3
WHH_48	2.1	34	2	3
WHH_48	1.5	46	2	3
WHH_48	1.7	53	2	3
WHH_48	1.9	61	2	3
WHH_48	2	67	2	3
WHH_48	1.7	80	2	3
WHH_48	1.7	87	2	3
WHH_49	1.1	0	2	3
WHH_49	1.7	3	2	3
WHH_49	2.5	7	2	3
WHH_49	2.1	28	2	3
WHH_49	1.7	46	2	3
WHH_49	2	60	2	3
WHH_49	2.2	81	2	3
WHH_49	2.1	109	2	3
WHH_50	1.2	0	2	3
WHH_50	2.6	3	2	3
WHH_50	2.8	8	2	3
WHH_50	1.7	15	2	3
WHH_50	2.1	18	2	3
WHH_50	2.3	24	2	3
WHH_50	2.6	38	2	3
WHH_50	2.3	59	2	3
WHH_50	1.9	87	2	3
WHH_51	1.1	0	2	3
WHH_51	1.4	3	2	3
WHH_51	2.9	9	2	3
WHH_51	2.6	16	2	3
WHH_51	2.8	25	2	3
WHH_51	2.8	39	2	3
WHH_51	3.5	50	2	3
WHH_51	3	59	2	3
WHH_51	2.7	73	2	3
WHH_51	2.2	101	2	3
WHH_52	1.1	0	2	3
WHH_52	1.9	7	2	3
WHH_52	2.7	11	2	3
WHH_52	2.2	18	2	3
WHH_52	1.9	32	2	3
WHH_52	2	46	2	3
WHH_52	2	60	2	3
WHH_52	2	81	2	3
WHH_52	1.6	116	2	3
RLH_3	1	0	2	3
RLH_3	2	3	2	3
RLH_3	2.9	7	2	3
RLH_3	1.9	14	2	3
RLH_3	3.3	21	2	3
RLH_3	3	28	2	3
RLH_4	1.1	0	2	3
RLH_4	2.1	3	2	3
RLH_4	2.7	11	2	3
RLH_4	3	15	2	3
RLH_4	2	25	2	3
RLH_4	2.2	32	2	3
RLH_4	2.1	39	2	3
RLH_4	2	53	2	3
RLH_4	1.7	67	2	3
RLH_4	2.4	81	2	3
RLH_4	2	102	2	3
RLH_6	1	0	2	3
RLH_6	2	3	2	3
RLH_6	3.4	9	2	3
RLH_6	2.2	27	2	3
RLH_6	2.7	36	2	3
RLH_6	2.4	71	2	3
RLH_6	2.9	99	2	3
RLH_7	1	0	2	3
RLH_7	1.4	3	2	3
RLH_7	1.9	5	2	3
RLH_7	2.9	10	2	3
RLH_7	1.9	17	2	3
RLH_7	1.9	24	2	3
RLH_7	1.7	31	2	3
RLH_7	1.9	38	2	3
RLH_7	2.2	45	2	3
RLH_7	2.5	59	2	3
RLH_7	2.1	80	2	3
RLH_7	2.2	108	2	3
RLH_9	1	0	2	3
RLH_9	1.6	3	2	3
RLH_9	5.2	10	2	3
RLH_9	2.5	12	2	3
RLH_9	1.8	13	2	3
RLH_9	1.3	14	2	3
RLH_9	1.2	18	2	3
RLH_9	1.5	21	2	3
RLH_9	3.3	28	2	3
RLH_9	3.9	35	2	3
RLH_9	2.6	42	2	3
RLH_9	2.2	56	2	3
RLH_9	2.1	77	2	3
RLH_9	1.8	98	2	3
WHH_1	1.1	0	2	3
WHH_1	1.3	3	2	3
WHH_1	3.1	10	2	3
WHH_1	3.5	17	2	3
WHH_1	3.3	24	2	3
WHH_1	3.7	31	2	3
WHH_1	2.9	38	2	3
WHH_1	2.6	52	2	3
WHH_1	1.9	73	2	3
WHH_1	2	98	2	3
WHH_2	1.1	0	2	3
WHH_2	2.5	3	2	3
WHH_2	3.2	6	2	3
WHH_2	3.6	12	2	3
WHH_2	2	19	2	3
WHH_2	2.2	28	2	3
WHH_2	1.6	35	2	3
WHH_2	2	42	2	3
WHH_2	1.9	48	2	3
WHH_2	2.2	62	2	3
WHH_2	2.3	90	2	3
WHH_3	1.1	0	2	3
WHH_3	1.8	3	2	3
WHH_3	3.2	12	2	3
WHH_3	2	14	2	3
WHH_3	2.2	21	2	3
WHH_3	2.4	28	2	3
WHH_3	2.1	40	2	3
WHH_3	2.7	61	2	3
WHH_3	2.4	89	2	3
WHH_4	1.1	0	2	3
WHH_4	1.6	3	2	3
WHH_4	3.1	9	2	3
WHH_4	2.6	15	2	3
WHH_4	1.7	23	2	3
WHH_4	2.3	37	2	3
WHH_4	2.5	58	2	3
WHH_4	3	72	2	3
WHH_4	2.4	93	2	3
WHH_5	1.1	0	2	3
WHH_5	1.4	7	2	3
WHH_5	1.5	14	2	3
WHH_5	2	21	2	3
WHH_5	2.2	28	2	3
WHH_5	2.1	42	2	3
WHH_5	2.6	57	2	3
WHH_5	2	84	2	3
WHH_6	1.1	0	2	3
WHH_6	1.4	3	2	3
WHH_6	3.4	10	2	3
WHH_6	2.6	17	2	3
WHH_6	2.5	28	2	3
WHH_6	1.8	49	2	3
WHH_6	1.8	63	2	3
WHH_6	2.1	77	2	3
WHH_6	2.2	98	2	3
WHH_7	1	0	2	3
WHH_7	2.5	3	2	3
WHH_7	3.1	7	2	3
WHH_7	5	14	2	3
WHH_7	2.1	21	2	3
WHH_7	2.9	35	2	3
WHH_7	2.8	52	2	3
WHH_7	2.3	77	2	3
WHH_7	2.2	112	2	3
WHH_8	1.1	0	2	3
WHH_8	1.7	3	2	3
WHH_8	2.6	6	2	3
WHH_8	2.1	13	2	3
WHH_8	2.3	27	2	3
WHH_8	2.4	48	2	3
WHH_8	2.1	83	2	3
WHH_8	3.1	118	2	3
WHH_9	1	0	2	3
WHH_9	1.8	3	2	3
WHH_9	2.2	5	2	3
WHH_9	2.5	6	2	3
WHH_9	2.7	11	2	3
WHH_9	3	18	2	3
WHH_9	3	32	2	3
WHH_9	1.9	53	2	3
WHH_9	2.9	60	2	3
WHH_9	2.8	67	2	3
WHH_9	2.2	81	2	3
WHH_9	4.3	95	2	3
WHH_10	1.1	0	2	3
WHH_10	1.6	3	2	3
WHH_10	3.5	7	2	3
WHH_10	1.7	14	2	3
WHH_10	1.7	21	2	3
WHH_10	1.9	27	2	3
WHH_10	2	41	2	3
WHH_10	1.8	55	2	3
WHH_10	2.2	70	2	3
WHH_10	1.9	76	2	3
WHH_11	1.1	0	2	3
WHH_11	1.4	2	2	3
WHH_11	2.9	7	2	3
WHH_11	2.9	13	2	3
WHH_11	2.6	27	2	3
WHH_11	3	49	2	3
WHH_11	1.4	71	2	3
WHH_11	1.9	76	2	3
WHH_12	1	0	2	3
WHH_12	3.4	3	2	3
WHH_12	2.5	4	2	3
WHH_12	3.1	11	2	3
WHH_12	3.5	18	2	3
WHH_12	1.7	25	2	3
WHH_12	2.6	32	2	3
WHH_12	3.5	46	2	3
WHH_12	2.8	58	2	3
WHH_12	2.1	74	2	3
WHH_12	2.8	95	2	3
WHH_13	1.1	0	2	3
WHH_13	1.3	3	2	3
WHH_13	1.4	5	2	3
WHH_13	3	7	2	3
WHH_13	4.1	11	2	3
WHH_13	2.4	18	2	3
WHH_13	3.7	32	2	3
WHH_13	3.8	46	2	3
WHH_13	2.3	60	2	3
WHH_13	1.6	81	2	3
WHH_14	1.1	0	2	3
WHH_14	1.9	3	2	3
WHH_14	3.1	7	2	3
WHH_14	3.6	14	2	3
WHH_14	2	21	2	3
WHH_14	1.6	31	2	3
WHH_14	2.1	39	2	3
WHH_14	2.2	48	2	3
WHH_14	2.6	70	2	3
WHH_14	2.2	98	2	3
WHH_15	1	0	2	3
WHH_15	1.2	3	2	3
WHH_15	2.9	7	2	3
WHH_15	2.1	14	2	3
WHH_15	2.7	28	2	3
WHH_15	2.1	70	2	3
WHH_15	1.2	140	2	3
WHH_16	1	0	2	3
WHH_16	1.8	3	2	3
WHH_16	3.3	9	2	3
WHH_16	4.4	16	2	3
WHH_16	1.8	25	2	3
WHH_16	1.4	39	2	3
WHH_16	1.6	46	2	3
WHH_16	1.6	53	2	3
WHH_16	1.9	60	2	3
WHH_16	1.6	74	2	3
WHH_16	1.5	93	2	3
WHH_17	1.1	0	2	3
WHH_17	1.6	3	2	3
WHH_17	2.2	6	2	3
WHH_17	4.4	12	2	3
WHH_17	1.9	18	2	3
WHH_17	2.7	25	2	3
WHH_17	3	39	2	3
WHH_17	2.5	60	2	3
WHH_17	2.3	67	2	3
WHH_17	1.9	73	2	3
WHH_17	2.5	80	2	3
WHH_17	2.4	87	2	3
WHH_18	1.1	0	2	3
WHH_18	1.2	3	2	3
WHH_18	1.9	8	2	3
WHH_18	2.3	15	2	3
WHH_18	2.3	29	2	3
WHH_18	2.3	49	2	3
WHH_18	2.1	77	2	3
WHH_18	2.4	119	2	3
WHH_19	1.1	0	2	3
WHH_19	2.1	3	2	3
WHH_19	1.5	8	2	3
WHH_19	1.7	15	2	3
WHH_19	3.1	22	2	3
WHH_19	4.5	29	2	3
WHH_19	3.5	36	2	3
WHH_19	2.2	43	2	3
WHH_19	2.7	57	2	3
WHH_19	3.3	78	2	3
WHH_19	2.6	92	2	3
WHH_20	1	0	2	3
WHH_20	2.4	3	2	3
WHH_20	1.5	6	2	3
WHH_20	2.1	14	2	3
WHH_20	2.5	32	2	3
WHH_20	1.7	56	2	3
WHH_20	3.1	74	2	3
WHH_20	2.1	88	2	3
WHH_22	1	0	2	3
WHH_22	1.8	3	2	3
WHH_22	4.4	8	2	3
WHH_22	3.4	15	2	3
WHH_22	3.3	21	2	3
WHH_22	2.4	28	2	3
WHH_22	2.4	35	2	3
WHH_22	2.3	42	2	3
WHH_22	1.6	63	2	3
WHH_22	2.5	77	2	3
WHH_22	1.8	102	2	3
WHH_23	1.1	0	2	3
WHH_23	2.5	3	2	3
WHH_23	4	7	2	3
WHH_23	3.3	13	2	3
WHH_23	2.4	20	2	3
WHH_23	2.9	41	2	3
WHH_23	3.6	69	2	3
WHH_23	1.9	83	2	3
WHH_23	2.5	98	2	3
WHH_24	1	0	2	3
WHH_24	1.1	3	2	3
WHH_24	2	7	2	3
WHH_24	2	14	2	3
WHH_24	1.9	25	2	3
WHH_24	1.8	39	2	3
WHH_24	3.2	46	2	3
WHH_24	2.5	53	2	3
WHH_24	2.9	67	2	3
WHH_24	1.4	88	2	3
WHH_25	1	0	2	3
WHH_25	1.8	3	2	3
WHH_25	2.7	8	2	3
WHH_25	3.7	14	2	3
WHH_25	1.8	21	2	3
WHH_25	2.3	35	2	3
WHH_25	2.3	56	2	3
WHH_25	2.4	86	2	3
WHH_26	1.1	0	2	3
WHH_26	1.5	3	2	3
WHH_26	2.7	7	2	3
WHH_26	1.9	14	2	3
WHH_26	1.7	21	2	3
WHH_26	1.7	28	2	3
WHH_26	1.8	35	2	3
WHH_26	1.8	42	2	3
WHH_26	2.2	49	2	3
WHH_26	3.4	61	2	3
WHH_26	3.2	75	2	3
WHH_26	2.6	89	2	3
WHH_27	1.1	0	2	3
WHH_27	1.5	3	2	3
WHH_27	4.1	11	2	3
WHH_27	3.2	21	2	3
WHH_27	2.5	32	2	3
WHH_27	2.3	46	2	3
WHH_27	1.9	67	2	3
WHH_27	2	88	2	3
WHH_28	1.2	0	2	3
WHH_28	2.6	3	2	3
WHH_28	3.5	7	2	3
WHH_28	4.4	14	2	3
WHH_28	1.8	21	2	3
WHH_28	1.9	28	2	3
WHH_28	1.6	42	2	3
WHH_28	1.8	54	2	3
WHH_28	2	7	2	3
WHH_28	2.5	89	2	3
WHH_29	1	0	2	3
WHH_29	1.3	3	2	3
WHH_29	2.4	6	2	3
WHH_29	2.1	8	2	3
WHH_29	3.7	15	2	3
WHH_29	3.9	24	2	3
WHH_29	3.5	31	2	3
WHH_29	2.5	38	2	3
WHH_29	2.3	45	2	3
WHH_29	2.3	59	2	3
WHH_29	2.2	80	2	3
WHH_29	3.1	108	2	3
WHH_30	1.1	0	2	3
WHH_30	1.7	3	2	3
WHH_30	2.3	5	2	3
WHH_30	2.8	12	2	3
WHH_30	3	26	2	3
WHH_30	2.8	40	2	3
WHH_30	4.1	61	2	3
WHH_30	3.5	75	2	3
WHH_30	3.2	89	2	3
WHH_31	1	0	2	3
WHH_31	1.7	3	2	3
WHH_31	2.7	7	2	3
WHH_31	2.3	14	2	3
WHH_31	2	28	2	3
WHH_31	1.8	49	2	3
WHH_31	2.1	57	2	3
WHH_31	2.4	85	2	3
WHH_34	1.1	0	2	3
WHH_34	1.9	3	2	3
WHH_34	3.3	28	2	3
WHH_34	1.6	49	2	3
WHH_34	2.4	63	2	3
WHH_34	1.7	84	2	3
WHH_35	1.1	0	2	3
WHH_35	1.4	3	2	3
WHH_35	3.1	15	2	3
WHH_35	1.6	22	2	3
WHH_35	3	36	2	3
WHH_35	3.6	60	2	3
WHH_35	2.4	74	2	3
WHH_35	2.7	94	2	3
WHH_36	1	0	2	3
WHH_36	1.9	3	2	3
WHH_36	2.7	12	2	3
WHH_36	2.6	19	2	3
WHH_36	2.5	33	2	3
WHH_36	2	54	2	3
WHH_36	2.7	82	2	3
WHH_36	2.2	124	2	3
WHH_37	1.1	0	2	3
WHH_37	2.4	3	2	3
WHH_37	3.8	27	2	3
WHH_37	1.3	38	2	3
WHH_37	1.8	45	2	3
WHH_37	2	56	2	3
WHH_37	2.6	77	2	3
WHH_37	2.2	105	2	3
WHH_38	1	0	2	3
WHH_38	1.6	3	2	3
WHH_38	1.8	21	2	3
WHH_38	1.9	28	2	3
WHH_38	2.1	35	2	3
WHH_38	2.2	49	2	3
WHH_38	2.3	70	2	3
WHH_38	1.9	98	2	3
WHH_39	1	0	2	3
WHH_39	1.2	3	2	3
WHH_39	2.2	22	2	3
WHH_39	2.2	36	2	3
WHH_39	1.8	57	2	3
WHH_39	1.7	71	2	3
WHH_39	1.5	85	2	3
WHH_39	2	99	2	3
WHH_40	1	0	2	3
WHH_40	1.7	3	2	3
WHH_40	3	14	2	3
WHH_40	2.2	28	2	3
WHH_40	1.9	49	2	3
WHH_40	1.7	63	2	3
WHH_40	2.1	77	2	3
WHH_40	2	98	2	3
WHH_41	1.1	0	2	3
WHH_41	2.6	3	2	3
WHH_41	2.4	29	2	3
WHH_41	1.4	50	2	3
WHH_41	1.6	64	2	3
WHH_41	1.5	79	2	3
WHH_41	1.5	85	2	3
WHH_41	1.6	99	2	3
WHH_42	1.1	0	2	3
WHH_42	2	3	2	3
WHH_42	2	21	2	3
WHH_42	1.6	35	2	3
WHH_42	1.6	49	2	3
WHH_42	1.6	63	2	3
WHH_42	1.9	73	2	3
WHH_42	2.2	87	2	3
RLH_8	1	0	2	3
RLH_8	1.8	3	2	3
RLH_8	2.3	6	2	3
RLH_8	3.8	14	2	3
RLH_8	2.5	27	2	3
RLH_8	2.7	34	2	3
RLH_8	2.7	48	2	3
RLH_8	2.3	69	2	3
RLH_8	1.7	97	2	3
WHH_33	1	0	2	3
WHH_33	2.1	4	2	3
WHH_33	2.5	10	2	3
WHH_33	2.4	24	2	3
WHH_33	2	37	2	3
WHH_33	2.4	58	2	3
WHH_33	2.5	86	2	3
CCH_059	1	0	2	3
CCH_059	1.4	4	2	3
CCH_059	2.1	7	2	3
CCH_059	2.1	14	2	3
CCH_059	1.9	22	2	3
CCH_059	2.1	26	2	3
CCH_059	1.3	32	2	3
CCH_059	1.5	40	2	3
CCH_059	1.6	46	2	3
CCH_059	1.9	53	2	3
CCH_059	2.6	60	2	3
CCH_059	2	69	2	3
CCH_059	1.1	76	2	3
CCH_059	1.2	86	2	3
RLH_010	1	0	2	3
RLH_010	1.8	4	2	3
RLH_010	3.1	8	2	3
RLH_010	3.3	16	2	3
RLH_010	3.2	23	2	3
RLH_010	1.9	30	2	3
RLH_010	2.6	37	2	3
RLH_010	2.3	51	2	3
RLH_010	2.6	72	2	3
WHH_053	1	0	2	3
WHH_053	1.9	4	2	3
WHH_053	1.9	6	2	3
WHH_053	3.5	14	2	3
WHH_053	3.3	21	2	3
WHH_053	2.1	29	2	3
WHH_053	1.9	43	2	3
WHH_053	2.2	64	2	3
CCH_052	1.1	0	2	3
CCH_052	1.6	4	2	3
CCH_052	2.2	8	2	3
CCH_052	2.4	11	2	3
CCH_052	2.7	18	2	3
CCH_052	2.2	30	2	3
CCH_052	2.2	44	2	3
CCH_052	2.2	66	2	3

## Sheet: control
control	INR	time	Lower	Upper
AIN_2	1.2	0	2	3
AIN_2	1	7	2	3
AIN_2	1.6	14	2	3
AIN_2	1.9	21	2	3
AIN_2	1.7	28	2	3
AIN_2	2.4	35	2	3
AIN_2	2.4	49	2	3
AIN_2	2.2	70	2	3
AIN_2	2.5	98	2	3
AIN_3	1.1	0	2	3
AIN_3	1.2	7	2	3
AIN_3	1.5	14	2	3
AIN_3	2	21	2	3
AIN_3	2.5	28	2	3
AIN_3	1.9	35	2	3
AIN_3	1.7	42	2	3
AIN_3	2.4	49	2	3
AIN_3	2.2	88	2	3
AIN_4	1	0	2	3
AIN_4	1.4	23	2	3
AIN_4	1.5	30	2	3
AIN_4	2.5	42	2	3
AIN_4	2	56	2	3
AIN_4	3.3	77	2	3
AIN_4	2.6	91	2	3
AIN_5	1.2	0	2	3
AIN_5	1.3	9	2	3
AIN_5	1.8	15	2	3
AIN_5	1.4	23	2	3
AIN_5	2.1	30	2	3
AIN_5	3	44	2	3
AIN_5	1.9	65	2	3
AIN_5	3.1	86	2	3
AIN_6	1.1	0	2	3
AIN_6	1.3	7	2	3
AIN_6	1.3	16	2	3
AIN_6	1.8	23	2	3
AIN_6	2.7	30	2	3
AIN_6	2	44	2	3
AIN_6	2.2	65	2	3
AIN_6	2.3	93	2	3
AIN_7	1.1	0	2	3
AIN_7	1.5	8	2	3
AIN_7	1.8	15	2	3
AIN_7	1.8	22	2	3
AIN_7	2.1	29	2	3
AIN_7	1.8	36	2	3
AIN_7	1.7	43	2	3
AIN_7	1.7	50	2	3
AIN_7	1.5	65	2	3
AIN_7	2.5	85	2	3
AIN_8	1	0	2	3
AIN_8	1.1	5	2	3
AIN_8	1.1	12	2	3
AIN_8	1.2	19	2	3
AIN_8	1.8	26	2	3
AIN_8	3.2	33	2	3
AIN_8	2.7	40	2	3
AIN_8	1.9	47	2	3
AIN_8	3.2	54	2	3
AIN_8	2.4	68	2	3
AIN_8	2.5	82	2	3
AIN_8	1.9	96	2	3
AIN_9	1	0	2	3
AIN_9	1	7	2	3
AIN_9	1.2	14	2	3
AIN_9	1.8	21	2	3
AIN_9	2.1	28	2	3
AIN_9	2.5	35	2	3
AIN_9	2.1	49	2	3
AIN_9	1.8	84	2	3
AIN_10	1.1	0	2	3
AIN_10	1.9	8	2	3
AIN_10	2.3	15	2	3
AIN_10	2.1	22	2	3
AIN_10	2.4	29	2	3
AIN_10	3.2	43	2	3
AIN_10	2.3	57	2	3
AIN_10	2.1	78	2	3
AIN_10	2.4	196	2	3
AIN_11	1.2	0	2	3
AIN_11	1.5	7	2	3
AIN_11	2.6	14	2	3
AIN_11	2.6	21	2	3
AIN_11	2.6	35	2	3
AIN_11	2.3	56	2	3
AIN_11	1.9	77	2	3
AIN_11	2.1	98	2	3
AIN_13	1.1	0	2	3
AIN_13	1.6	10	2	3
AIN_13	2.5	17	2	3
AIN_13	4.2	24	2	3
AIN_13	4.3	31	2	3
AIN_13	4.3	38	2	3
AIN_13	3	45	2	3
AIN_13	2.9	54	2	3
AIN_13	1.9	68	2	3
AIN_13	2.5	82	2	3
AIN_13	2.4	103	2	3
LTH_1	1	0	2	3
LTH_1	1	5	2	3
LTH_1	1.1	12	2	3
LTH_1	1.5	19	2	3
LTH_1	1.6	26	2	3
LTH_1	2.4	33	2	3
LTH_1	2.7	40	2	3
LTH_1	2.3	47	2	3
LTH_1	2.3	54	2	3
LTH_1	2	70	2	3
LTH_1	2.5	91	2	3
LTH_2	1.1	0	2	3
LTH_2	1.1	5	2	3
LTH_2	1.4	12	2	3
LTH_2	1.4	19	2	3
LTH_2	2.9	26	2	3
LTH_2	2.3	33	2	3
LTH_2	3.5	40	2	3
LTH_2	2.7	47	2	3
LTH_2	2.2	54	2	3
LTH_2	2.3	61	2	3
LTH_2	2	69	2	3
LTH_2	2.5	77	2	3
LTH_2	2.1	89	2	3
LTH_3	1.1	0	2	3
LTH_3	4.9	5	2	3
LTH_3	3.4	7	2	3
LTH_3	6	19	2	3
LTH_3	3.1	26	2	3
LTH_3	2.9	33	2	3
LTH_3	1.3	40	2	3
LTH_3	1.2	47	2	3
LTH_3	1.3	54	2	3
LTH_3	3.7	62	2	3
LTH_3	1.3	68	2	3
LTH_3	1.2	84	2	3
LTH_4	0.9	0	2	3
LTH_4	1.4	5	2	3
LTH_4	2.8	12	2	3
LTH_4	3.3	19	2	3
LTH_4	2.6	26	2	3
LTH_4	2.2	33	2	3
LTH_4	2.3	40	2	3
LTH_4	2.7	54	2	3
LTH_4	2.4	68	2	3
LTH_4	2.9	89	2	3
LTH_5	0.9	0	2	3
LTH_5	0.9	12	2	3
LTH_5	0.9	19	2	3
LTH_5	1.8	33	2	3
LTH_5	1	40	2	3
LTH_5	1.6	47	2	3
LTH_5	1.6	54	2	3
LTH_5	0.9	61	2	3
LTH_5	1.9	68	2	3
LTH_5	0.9	82	2	3
LTH_5	1.3	89	2	3
LTH_6	1	0	2	3
LTH_6	1	5	2	3
LTH_6	1.6	12	2	3
LTH_6	1.7	19	2	3
LTH_6	2.2	26	2	3
LTH_6	2	33	2	3
LTH_6	2.2	40	2	3
LTH_6	2.3	47	2	3
LTH_6	1.9	63	2	3
LTH_6	2.3	70	2	3
LTH_6	1.9	82	2	3
LTH_6	1.8	96	2	3
LTH_8	0.9	0	2	3
LTH_8	1.3	5	2	3
LTH_8	2.8	12	2	3
LTH_8	2.8	19	2	3
LTH_8	3	33	2	3
LTH_8	1.8	49	2	3
LTH_8	2.3	61	2	3
LTH_8	2.7	75	2	3
LTH_8	2.9	89	2	3
LTH_9	1	0	2	3
LTH_9	1.1	5	2	3
LTH_9	4.5	12	2	3
LTH_9	2.5	26	2	3
LTH_9	4.6	33	2	3
LTH_9	6.6	40	2	3
LTH_9	2.3	47	2	3
LTH_9	1.7	53	2	3
LTH_9	3.7	61	2	3
LTH_9	6.2	68	2	3
LTH_9	1.6	75	2	3
LTH_9	1.9	82	2	3
LTH_9	2.2	89	2	3
LTH_10	1.1	0	2	3
LTH_10	1.4	5	2	3
LTH_10	4.2	12	2	3
LTH_10	3.4	21	2	3
LTH_10	2.2	26	2	3
LTH_10	2.3	33	2	3
LTH_10	1.7	47	2	3
LTH_10	1.9	61	2	3
LTH_10	2.1	68	2	3
LTH_10	2.2	82	2	3
LTH_10	2.4	96	2	3
LTH_11	1	0	2	3
LTH_11	1	7	2	3
LTH_11	1.2	14	2	3
LTH_11	1.2	19	2	3
LTH_11	1.4	26	2	3
LTH_11	1.6	33	2	3
LTH_11	2.1	40	2	3
LTH_11	2.9	47	2	3
LTH_11	2.6	54	2	3
LTH_11	3	61	2	3
LTH_11	1.3	75	2	3
LTH_11	2	82	2	3
LTH_11	2.4	89	2	3
LTH_12	0.8	0	2	2.5
LTH_12	1.1	5	2	2.5
LTH_12	1.4	12	2	2.5
LTH_12	1.6	19	2	2.5
LTH_12	2.2	26	2	2.5
LTH_12	2.4	33	2	2.5
LTH_12	2.2	47	2	2.5
LTH_12	2.1	70	2	2.5
LTH_12	2.8	77	2	2.5
LTH_12	3.8	91	2	2.5
LTH_14	0.9	0	2	2.5
LTH_14	1	5	2	3
LTH_14	1.5	12	2	3
LTH_14	2.3	19	2	3
LTH_14	2.6	26	2	3
LTH_14	2.5	40	2	3
LTH_14	3.6	54	2	3
LTH_14	2.2	61	2	3
LTH_14	1.8	68	2	3
LTH_14	2.4	75	2	3
LTH_14	3	89	2	3
LTH_15	1	0	2	3
LTH_15	1	5	2	3
LTH_15	1.5	12	2	3
LTH_15	2.4	19	2	3
LTH_15	2.1	26	2	3
LTH_15	2.1	33	2	3
LTH_15	1.9	47	2	3
LTH_15	2	61	2	3
LTH_15	2	75	2	3
LTH_15	1.9	96	2	3
LTH_16	1.1	0	2	3
LTH_16	1.5	5	2	3
LTH_16	2.6	12	2	3
LTH_16	2.6	19	2	3
LTH_16	2.3	26	2	3
LTH_16	2	33	2	3
LTH_16	2.2	39	2	3
LTH_16	1.9	53	2	3
LTH_16	2	67	2	3
LTH_16	2.1	88	2	3
LTH_17	1.1	0	2	3
LTH_17	1.2	5	2	3
LTH_17	1.7	12	2	3
LTH_17	2.1	19	2	3
LTH_17	2.2	26	2	3
LTH_17	1.9	33	2	3
LTH_17	1.5	49	2	3
LTH_17	1.7	54	2	3
LTH_17	2.3	63	2	3
LTH_17	2.8	68	2	3
LTH_17	4.1	82	2	3
LTH_17	1.8	91	2	3
LTH_19	1	0	2	3
LTH_19	1.1	5	2	3
LTH_19	1.1	12	2	3
LTH_19	1.6	19	2	3
LTH_19	2.3	33	2	3
LTH_19	2.4	47	2	3
LTH_19	2.6	54	2	3
LTH_19	1.7	68	2	3
LTH_19	1.8	75	2	3
LTH_19	2.2	83	2	3
LTH_19	1.5	103	2	3
LTH_21	1	0	2	3
LTH_21	1.3	6	2	3
LTH_21	1.8	13	2	3
LTH_21	2.7	20	2	3
LTH_21	2.6	27	2	3
LTH_21	2.2	34	2	3
LTH_21	2.4	48	2	3
LTH_21	2	62	2	3
LTH_21	1.7	75	2	3
LTH_21	2.3	89	2	3
LTH_23	1.1	0	2	3
LTH_23	1	5	2	3
LTH_23	1.2	12	2	3
LTH_23	1.4	19	2	3
LTH_23	1.3	26	2	3
LTH_23	2.5	33	2	3
LTH_23	3.9	40	2	3
LTH_23	2.2	47	2	3
LTH_23	2.5	54	2	3
LTH_23	3.7	61	2	3
LTH_23	2.4	68	2	3
LTH_23	2.2	82	2	3
LTH_23	2.6	89	2	3
STK_1	1.2	0	2	3
STK_1	1.2	4	2	3
STK_1	2.3	11	2	3
STK_1	3.8	18	2	3
STK_1	2.2	25	2	3
STK_1	2.7	94	2	3
STK_4	1.3	0	2	3
STK_4	2.2	7	2	3
STK_4	1.7	14	2	3
STK_4	2.5	21	2	3
STK_4	2.6	35	2	3
STK_4	2.4	56	2	3
STK_4	3.9	97	2	3
STK_2	0.9	0	2	3
STK_2	1.3	4	2	3
STK_2	2.2	7	2	3
STK_2	2.6	11	2	3
STK_2	2.2	18	2	3
STK_2	3.4	31	2	3
STK_2	2.5	45	2	3
STK_2	2	59	2	3
STK_2	3.5	73	2	3
STK_2	2.5	84	2	3
STK_5	1.1	0	2	3
STK_5	1.1	7	2	3
STK_5	1.2	14	2	3
STK_5	1.7	21	2	3
STK_5	2.6	28	2	3
STK_5	2.9	35	2	3
STK_5	2.4	55	2	3
STK_5	3	83	2	3
STK_5	2.7	105	2	3
STK_6	1	0	2	3
STK_6	2.3	6	2	3
STK_6	5.2	13	2	3
STK_6	1.7	19	2	3
STK_6	1.4	26	2	3
STK_6	1.8	33	2	3
STK_6	2.4	40	2	3
STK_6	2.4	47	2	3
STK_6	2.6	61	2	3
STK_6	2.8	84	2	3
STK_7	1.2	0	2	3
STK_7	1.2	1	2	3
STK_7	1.4	3	2	3
STK_7	2.7	19	2	3
STK_7	3.3	33	2	3
STK_7	3	40	2	3
STK_7	2.5	54	2	3
STK_7	3	84	2	3
STK_8	1	0	2	3
STK_8	1.1	7	2	3
STK_8	1.2	14	2	3
STK_8	1.3	22	2	3
STK_8	1.6	29	2	3
STK_8	2.2	36	2	3
STK_8	2.1	44	2	3
STK_8	2.3	58	2	3
STK_8	2.4	159	2	3
STK_9	1	0	2	3
STK_9	2.1	8	2	3
STK_9	2.1	12	2	3
STK_9	2.2	20	2	3
STK_9	1.9	28	2	3
STK_9	2.7	41	2	3
STK_9	3	48	2	3
STK_9	3.1	62	2	3
STK_9	1.9	76	2	3
STK_9	2.2	90	2	3
STK_10	1.1	0	2	3
STK_10	1.4	3	2	3
STK_10	2	7	2	3
STK_10	1.5	10	2	3
STK_10	2.3	17	2	3
STK_10	2.3	23	2	3
STK_10	2	30	2	3
STK_10	1.8	37	2	3
STK_10	2.1	42	2	3
STK_10	3.6	45	2	3
STK_10	1.8	50	2	3
STK_10	2.6	97	2	3
STK_12	1	0	2	3
STK_12	1.3	4	2	3
STK_12	2.4	7	2	3
STK_12	3.7	18	2	3
STK_12	4	25	2	3
STK_12	2.5	29	2	3
STK_12	3.4	39	2	3
STK_12	4.3	46	2	3
STK_12	2.4	53	2	3
STK_12	2.8	67	2	3
STK_12	5.4	89	2	3
STK_13	1	0	2	3
STK_13	2	3	2	3
STK_13	1.7	6	2	3
STK_13	2.3	10	2	3
STK_13	2.8	16	2	3
STK_13	2.6	23	2	3
STK_13	3.1	37	2	3
STK_13	3.6	51	2	3
STK_13	2.9	65	2	3
STK_13	2.3	73	2	3
STK_13	2.6	93	2	3
STK_14	1	0	2	3
STK_14	1	2	2	3
STK_14	1	3	2	3
STK_14	2.7	4	2	3
STK_14	3.6	5	2	3
STK_14	2	7	2	3
STK_14	2	8	2	3
STK_14	2.3	10	2	3
STK_14	2.5	18	2	3
STK_14	2.9	22	2	3
STK_14	2.7	29	2	3
STK_14	2.6	43	2	3
STK_14	2.1	63	2	3
STK_14	2.2	91	2	3
STK_15	1.3	0	2	3
STK_15	3.2	4	2	3
STK_15	4.6	8	2	3
STK_15	2.5	11	2	3
STK_15	2.3	12	2	3
STK_15	1.9	14	2	3
STK_15	2	15	2	3
STK_15	1.9	16	2	3
STK_15	2.3	18	2	3
STK_15	3.3	20	2	3
STK_15	2.1	28	2	3
STK_15	2.4	39	2	3
STK_15	3.6	41	2	3
STK_15	3.5	42	2	3
STK_15	3.1	44	2	3
STK_15	4.3	56	2	3
STK_15	2.1	68	2	3
STK_15	2.6	82	2	3
STK_15	3.3	105	2	3
STK_16	0.9	0	2	3
STK_16	3.2	1	2	3
STK_16	1.6	4	2	3
STK_16	1.9	6	2	3
STK_16	1.9	7	2	3
STK_16	2.2	11	2	3
STK_16	2.5	15	2	3
STK_16	2.4	21	2	3
STK_16	2.5	28	2	3
STK_16	1.9	42	2	3
STK_16	2	48	2	3
STK_16	2	62	2	3
STK_16	2	83	2	3
STK_16	2	104	2	3
STK_17	1.1	0	2	3
STK_17	3.1	4	2	3
STK_17	2.3	7	2	3
STK_17	2	12	2	3
STK_17	2.1	19	2	3
STK_17	2.2	26	2	3
STK_17	2.2	33	2	3
STK_17	2.3	42	2	3
STK_17	2.4	56	2	3
STK_17	4.6	117	2	3
STK_18	1	0	2	3
STK_18	4	2	2	3
STK_18	5	3	2	3
STK_18	1.5	6	2	3
STK_18	1.3	9	2	3
STK_18	1.8	12	2	3
STK_18	3.7	16	2	3
STK_18	3.7	20	2	3
STK_18	3.1	24	2	3
STK_18	6.1	30	2	3
STK_18	2.7	34	2	3
STK_18	3.5	96	2	3
STK_19	0.9	0	2	3
STK_19	1.7	1	2	3
STK_19	2.9	2	2	3
STK_19	3.1	3	2	3
STK_19	3.1	6	2	3
STK_19	3.3	9	2	3
STK_19	2.5	14	2	3
STK_19	1.9	20	2	3
STK_19	2.6	27	2	3
STK_19	2.6	34	2	3
STK_19	1.6	45	2	3
STK_19	2.1	48	2	3
STK_19	1.7	55	2	3
STK_19	1.9	62	2	3
STK_19	1.9	69	2	3
STK_19	2.2	76	2	3
STK_19	2.1	83	2	3
STK_19	1.9	97	2	3
STK_22	0.9	0	2	3
STK_22	1.3	7	2	3
STK_22	2	14	2	3
STK_22	2.7	21	2	3
STK_22	3.4	28	2	3
STK_22	2.5	31	2	3
STK_22	2.8	38	2	3
STK_22	3.4	46	2	3
STK_22	1.9	53	2	3
STK_22	1.4	60	2	3
STK_22	1.4	72	2	3
STK_22	2.3	77	2	3
STK_22	2.1	88	2	3
STK_23	0.9	0	2	3
STK_23	2.9	7	2	3
STK_23	3.2	14	2	3
STK_23	2.1	21	2	3
STK_23	1.6	29	2	3
STK_23	2	36	2	3
STK_23	2.2	50	2	3
STK_23	2.2	78	2	3
STK_23	1.8	120	2	3
STK_24	1.1	0	2	3
STK_24	1.7	1	2	3
STK_24	3.4	2	2	3
STK_24	4.3	3	2	3
STK_24	3.3	4	2	3
STK_24	2.2	5	2	3
STK_24	1.6	14	2	3
STK_24	1.5	20	2	3
STK_24	2.4	28	2	3
STK_24	2.6	35	2	3
STK_24	2.8	51	2	3
STK_24	8	80	2	3
STK_24	1.5	83	2	3
STK_24	1.3	87	2	3
STK_25	1.2	0	2	3
STK_25	3.9	3	2	3
STK_25	6.9	6	2	3
STK_25	4.6	7	2	3
STK_25	4	10	2	3
STK_25	2.9	16	2	3
STK_25	2.2	20	2	3
STK_25	2.6	24	2	3
STK_25	3.1	30	2	3
STK_25	3.1	37	2	3
STK_25	3	45	2	3
STK_25	1.9	58	2	3
STK_25	1.7	62	2	3
STK_25	2.9	69	2	3
STK_25	3.1	76	2	3
STK_25	3.2	90	2	3
STK_26	1	0	2	3
STK_26	1.2	1	2	3
STK_26	2.3	2	2	3
STK_26	3.9	3	2	3
STK_26	5.7	4	2	3
STK_26	5.9	5	2	3
STK_26	5.9	9	2	3
STK_26	4.4	10	2	3
STK_26	2.8	13	2	3
STK_26	1.8	20	2	3
STK_26	1.9	24	2	3
STK_26	2.3	31	2	3
STK_26	2.5	38	2	3
STK_26	2.7	45	2	3
STK_26	2.3	59	2	3
STK_26	2.3	87	2	3
STK_27	1	0	2	3
STK_27	1.3	8	2	3
STK_27	2.9	15	2	3
STK_27	3.3	23	2	3
STK_27	2.9	30	2	3
STK_27	2.9	37	2	3
STK_27	3.2	44	2	3
STK_27	4.2	50	2	3
STK_27	2	57	2	3
STK_27	2.4	71	2	3
STK_27	2.2	92	2	3
STK_28	1	0	2	3
STK_28	1.3	1	2	3
STK_28	2.8	2	2	3
STK_28	2.6	3	2	3
STK_28	2.7	6	2	3
STK_28	2	11	2	3
STK_28	2.2	15	2	3
STK_28	2.1	21	2	3
STK_28	1.9	26	2	3
STK_28	5.5	34	2	3
STK_28	1.8	42	2	3
STK_28	2.3	50	2	3
STK_28	2.6	63	2	3
STK_28	1.7	76	2	3
STK_28	1.7	90	2	3
STK_29	1.1	0	2	3
STK_29	1.8	14	2	3
STK_29	1.9	20	2	3
STK_29	2.8	27	2	3
STK_29	1.5	34	2	3
STK_29	2.6	41	2	3
STK_29	2.7	48	2	3
STK_29	2.5	62	2	3
STK_29	4.6	90	2	3
STK_30	1.2	0	2	3
STK_30	1.4	7	2	3
STK_30	2.6	21	2	3
STK_30	3.6	28	2	3
STK_30	2.1	35	2	3
STK_30	2.6	42	2	3
STK_30	2.3	49	2	3
STK_30	2.5	56	2	3
STK_30	1.4	84	2	3
STK_31	1.1	0	2	3
STK_31	1.2	6	2	3
STK_31	2.1	13	2	3
STK_31	2.4	20	2	3
STK_31	2.4	34	2	3
STK_31	2.3	48	2	3
STK_31	2.8	69	2	3
STK_31	2.1	76	2	3
STK_31	2.2	104	2	3
STK_33	1	0	2	3
STK_33	1.1	7	2	3
STK_33	1.1	14	2	3
STK_33	1.2	21	2	3
STK_33	1.9	28	2	3
STK_33	1.7	35	2	3
STK_33	1.8	42	2	3
STK_33	3	49	2	3
STK_33	1.7	56	2	3
STK_33	2.8	63	2	3
STK_33	2.5	70	2	3
STK_33	3.4	77	2	3
STK_33	1.6	91	2	3
STK_35	1	0	2	3
STK_35	1.2	6	2	3
STK_35	1.9	13	2	3
STK_35	2.2	20	2	3
STK_35	2.3	27	2	3
STK_35	2.2	34	2	3
STK_35	2.2	41	2	3
STK_35	1.8	48	2	3
STK_35	1.7	56	2	3
STK_35	3.8	62	2	3
STK_35	2.9	69	2	3
STK_35	2.4	76	2	3
STK_35	2.8	84	2	3
STK_37	0.9	0	2	3
STK_37	1.1	2	2	3
STK_37	2	3	2	3
STK_37	1.8	6	2	3
STK_37	2.1	12	2	3
STK_37	2.8	16	2	3
STK_37	2.5	23	2	3
STK_37	2	30	2	3
STK_37	1.7	44	2	3
STK_37	1.9	51	2	3
STK_37	3	58	2	3
STK_37	1.9	65	2	3
STK_37	1.7	74	2	3
STK_37	2.3	81	2	3
STK_37	2.8	95	2	3
STK_38	1	0	2	3
STK_38	1.1	1	2	3
STK_38	1.6	2	2	3
STK_38	2.6	3	2	3
STK_38	2.1	6	2	3
STK_38	2.4	9	2	3
STK_38	2.7	16	2	3
STK_38	2.1	23	2	3
STK_38	2.1	37	2	3
STK_38	2	65	2	3
STK_38	2	86	2	3
STK_40	1	0	2	3
STK_40	1.1	4	2	3
STK_40	1.5	5	2	3
STK_40	1.7	8	2	3
STK_40	1.9	11	2	3
STK_40	1.9	14	2	3
STK_40	1.8	20	2	3
STK_40	2.8	22	2	3
STK_40	2.3	25	2	3
STK_40	2.3	28	2	3
STK_40	3.4	32	2	3
STK_40	2	36	2	3
STK_40	2.8	40	2	3
STK_40	3.2	47	2	3
STK_40	2.4	54	2	3
STK_40	3.3	68	2	3
STK_40	2.5	82	2	3
STK_40	1.7	110	2	3
STK_41	0.9	0	2	3
STK_41	1.8	2	2	3
STK_41	3.4	3	2	3
STK_41	2.4	6	2	3
STK_41	2.6	11	2	3
STK_41	2.4	18	2	3
STK_41	2.3	38	2	3
STK_41	1.8	66	2	3
STK_41	2.4	80	2	3
STK_41	2.2	87	2	3
STK_42	1.1	0	2	3
STK_42	1.5	7	2	3
STK_42	2.9	14	2	3
STK_42	2.5	21	2	3
STK_42	2.7	28	2	3
STK_42	3.4	35	2	3
STK_42	2.8	43	2	3
STK_42	3	57	2	3
STK_42	3.5	78	2	3
STK_42	1.9	92	2	3
STK_43	1	0	2	3
STK_43	1.1	9	2	3
STK_43	1.2	16	2	3
STK_43	1.2	23	2	3
STK_43	2	31	2	3
STK_43	3.1	38	2	3
STK_43	2.4	45	2	3
STK_43	2.9	52	2	3
STK_43	1.6	66	2	3
STK_43	2	73	2	3
STK_43	2.1	87	2	3
STK_44	1	0	2	3
STK_44	1.1	7	2	3
STK_44	1.2	13	2	3
STK_44	1.1	20	2	3
STK_44	1.2	27	2	3
STK_44	1.5	35	2	3
STK_44	1.1	63	2	3
STK_44	2.2	69	2	3
STK_44	2.5	78	2	3
STK_44	2.6	85	2	3
STK_45	1	0	2	3
STK_45	1.2	1	2	3
STK_45	2.1	2	2	3
STK_45	3.2	3	2	3
STK_45	3.1	4	2	3
STK_45	3.4	5	2	3
STK_45	5.4	8	2	3
STK_45	3.2	11	2	3
STK_45	2.1	14	2	3
STK_45	1.7	18	2	3
STK_45	1.7	20	2	3
STK_45	2.6	22	2	3
STK_45	5.3	26	2	3
STK_45	2.9	29	2	3
STK_45	2	34	2	3
STK_45	2.9	40	2	3
STK_45	2	54	2	3
STK_45	2	82	2	3
STK_45	2.7	110	2	3
STK_46	1.2	0	2	3
STK_46	2.9	4	2	3
STK_46	3.3	7	2	3
STK_46	4.8	18	2	3
STK_46	4.8	20	2	3
STK_46	1.1	32	2	3
STK_46	1.2	34	2	3
STK_46	2.1	36	2	3
STK_46	2.8	40	2	3
STK_46	2.9	41	2	3
STK_46	2.7	46	2	3
STK_46	1.7	55	2	3
STK_46	3	76	2	3
STK_46	2.3	83	2	3
STK_46	2.6	93	2	3
STK_47	1.1	0	2	3
STK_47	2.2	4	2	3
STK_47	5.3	7	2	3
STK_47	2.5	12	2	3
STK_47	3.3	15	2	3
STK_47	4.3	24	2	3
STK_47	2	34	2	3
STK_47	3.6	39	2	3
STK_47	2.1	43	2	3
STK_47	2	48	2	3
STK_47	2	55	2	3
STK_47	1.7	69	2	3
STK_47	1.6	76	2	3
STK_47	1.8	83	2	3
STK_47	1.5	90	2	3
STK_48	1.1	0	2	3
STK_48	1.8	2	2	3
STK_48	4.4	3	2	3
STK_48	4.8	6	2	3
STK_48	3	8	2	3
STK_48	2.1	10	2	3
STK_48	1.3	21	2	3
STK_48	1.3	24	2	3
STK_48	2.1	29	2	3
STK_48	2.5	35	2	3
STK_48	2.3	42	2	3
STK_48	2.6	66	2	3
STK_48	2.7	93	2	3
STK_49	1.1	0	2	3
STK_49	1.4	2	2	3
STK_49	1.8	3	2	3
STK_49	2.2	6	2	3
STK_49	2.5	8	2	3
STK_49	2.3	13	2	3
STK_49	2.9	21	2	3
STK_49	3	27	2	3
STK_49	2.5	41	2	3
STK_49	2.8	62	2	3
STK_49	2.3	83	2	3
STK_49	2.7	111	2	3
STK_50	1	0	2	3
STK_50	1.1	7	2	3
STK_50	1.4	15	2	3
STK_50	1.8	21	2	3
STK_50	2.7	29	2	3
STK_50	1.8	49	2	3
STK_50	2.4	56	2	3
STK_50	2.6	79	2	3
STK_50	1	105	2	3
STK_51	1.8	0	2	3
STK_51	2.6	7	2	3
STK_51	3.8	14	2	3
STK_51	1.3	21	2	3
STK_51	1.4	28	2	3
STK_51	2.1	35	2	3
STK_51	2.1	42	2	3
STK_51	2.1	49	2	3
STK_51	2.1	63	2	3
STK_51	2.3	84	2	3
STK_52	1	0	2	3
STK_52	1.8	7	2	3
STK_52	3.3	14	2	3
STK_52	4	21	2	3
STK_52	2.1	28	2	3
STK_52	2.3	35	2	3
STK_52	2.5	42	2	3
STK_52	2.5	56	2	3
STK_52	2.3	60	2	3
STK_52	1.8	71	2	3
STK_52	1.9	78	2	3
STK_52	2	85	2	3
STK_54	1	0	2	3
STK_54	1	32	2	3
STK_54	2	41	2	3
STK_54	3	48	2	3
STK_54	2	55	2	3
STK_54	2.1	62	2	3
STK_54	1.9	69	2	3
STK_54	2.5	76	2	3
STK_54	2.2	83	2	3
STK_54	2.4	102	2	3
STK_55	1.1	0	2	3
STK_55	1.1	33	2	3
STK_55	1.2	40	2	3
STK_55	1.9	47	2	3
STK_55	2.1	54	2	3
STK_55	2.3	61	2	3
STK_55	2.5	75	2	3
STK_55	2.5	82	2	3
STK_55	2.1	89	2	3
STK_57	1.1	0	2	3
STK_57	1.1	1	2	3
STK_57	2	5	2	3
STK_57	2.9	9	2	3
STK_57	2.4	12	2	3
STK_57	3.1	16	2	3
STK_57	3.8	23	2	3
STK_57	2.9	30	2	3
STK_57	3.5	37	2	3
STK_57	3.2	44	2	3
STK_57	2.8	52	2	3
STK_57	3.1	66	2	3
STK_57	2.4	80	2	3
STK_57	2.3	108	2	3
STK_58	1.1	0	2	3
STK_58	2.8	7	2	3
STK_58	3.9	14	2	3
STK_58	1.7	21	2	3
STK_58	1.8	28	2	3
STK_58	2.2	35	2	3
STK_58	2	42	2	3
STK_58	1.5	56	2	3
STK_58	1.6	63	2	3
STK_58	1.7	77	2	3
STK_58	2.8	84	2	3
AIN_001	1.1	0	2	3
AIN_001	1.1	1	2	3
AIN_001	1.3	8	2	3
AIN_001	1.8	15	2	3
AIN_001	1.5	22	2	3
AIN_001	1.7	28	2	3
AIN_001	1.7	35	2	3
AIN_001	3.9	49	2	3
AIN_012	1.1	0	2	3
AIN_012	1.1	1	2	3
AIN_012	1.9	8	2	3
AIN_012	2.9	15	2	3
LTH_018	1.1	0	2	3
LTH_018	1.1	1	2	3
LTH_018	1.1	9	2	3
LTH_018	1.3	15	2	3
LTH_018	1.3	23	2	3
LTH_018	2.5	31	2	3
LTH_018	2	38	2	3
LTH_018	2	55	2	3
LTH_018	2.1	68	2	3
LTH_020	1	0	2	3
LTH_020	1	1	2	3
LTH_020	1	6	2	3
LTH_020	1.4	13	2	3
LTH_020	1.9	20	2	3
LTH_020	1.7	27	2	3
LTH_020	3.1	31	2	3
LTH_020	2.5	41	2	3
LTH_020	2.2	48	2	3
LTH_020	2.2	55	2	3
LTH_022	1	0	2	3
LTH_022	1	1	2	3
LTH_022	1.2	6	2	3
LTH_022	1.6	13	2	3
LTH_022	2.6	20	2	3
LTH_022	1.6	27	2	3
LTH_022	1.6	34	2	3
LTH_022	2.1	41	2	3
LTH_022	2.2	48	2	3
LTH_022	2.7	62	2	3
LTH_024	1.1	0	2	3
LTH_024	1.1	1	2	3
LTH_024	1.1	6	2	3
LTH_024	1.3	13	2	3
LTH_024	2.3	20	2	3
LTH_024	3	27	2	3
LTH_024	2.5	34	2	3
LTH_024	1.6	41	2	3
LTH_024	2.3	48	2	3
LTH_024	1.8	55	2	3
LTH_024	2.8	62	2	3
LTH_024	2.2	69	2	3
LTH_024	1.6	83	2	3
LTH_025	1	0	2	3
LTH_025	1	1	2	3
LTH_025	1	6	2	3
LTH_025	1.7	13	2	3
LTH_025	3	20	2	3
LTH_025	3.4	27	2	3
LTH_025	2.5	34	2	3
LTH_025	2.4	41	2	3
LTH_025	2.3	55	2	3
LTH_025	2.2	69	2	3
LTH_025	2.1	83	2	3
LTH_025	2.3	90	2	3
STK_003	0.9	0	2	3
STK_003	0.9	1	2	3
STK_003	1.6	8	2	3
STK_003	2.7	22	2	3
STK_003	3.2	29	2	3
STK_003	2.4	36	2	3
STK_003	3.2	50	2	3
STK_003	2.1	65	2	3
STK_011	1.5	0	2	3
STK_011	1.5	1	2	3
STK_011	1.8	24	2	3
STK_011	2.2	38	2	3
STK_011	2.2	52	2	3
STK_011	2.4	63	2	3
STK_011	2.2	66	2	3
STK_020	0.9	0	2	3
STK_020	0.9	1	2	3
STK_020	1.2	2	2	3
STK_020	2.3	3	2	3
STK_020	3.2	4	2	3
STK_020	2.4	7	2	3
STK_020	1.9	10	2	3
STK_020	1.9	14	2	3
STK_020	4.6	46	2	3
STK_020	5.9	59	2	3
STK_021	1.2	0	2	3
STK_021	1.2	1	2	3
STK_021	2.3	2	2	3
STK_021	4.8	3	2	3
STK_021	4	4	2	3
STK_021	2.5	6	2	3
STK_021	2.1	7	2	3
STK_021	1.8	8	2	3
STK_021	1.4	9	2	3
STK_021	1.3	10	2	3
STK_021	1.3	11	2	3
STK_021	1.6	12	2	3
STK_021	2.7	15	2	3
STK_021	1	22	2	3
STK_021	1.9	25	2	3
STK_021	2.1	28	2	3
STK_021	2.1	29	2	3
STK_021	2.4	32	2	3
STK_021	2	35	2	3
STK_021	2.3	38	2	3
STK_032	1.2	0	2	3
STK_032	1.2	1	2	3
STK_032	1.3	2	2	3
STK_032	2.6	3	2	3
STK_032	5.1	4	2	3
STK_032	3.2	5	2	3
STK_032	3.4	6	2	3
STK_032	2.2	9	2	3
STK_032	2	12	2	3
STK_032	2	15	2	3
STK_034	1.1	0	2	3
STK_034	1.1	1	2	3
STK_034	1.1	2	2	3
STK_034	3.3	4	2	3
STK_034	3.2	10	2	3
STK_034	1.5	14	2	3
STK_034	1.4	20	2	3
STK_034	1.7	27	2	3
STK_034	2.1	34	2	3
STK_034	1.9	48	2	3
STK_036	1	0	2	3
STK_036	1	1	2	3
STK_036	1.2	3	2	3
STK_036	1.6	4	2	3
STK_036	2.4	7	2	3
STK_036	2.7	10	2	3
STK_036	3.6	17	2	3
STK_036	2.3	31	2	3
STK_036	2	45	2	3
STK_036	2.5	66	2	3
STK_039	1	0	2	3
STK_039	1	1	2	3
STK_039	3.7	5	2	3
STK_039	2.4	8	2	3
STK_039	2.2	13	2	3
STK_039	1.8	16	2	3
STK_039	5.2	40	2	3
STK_039	2.1	42	2	3
STK_039	2.4	49	2	3
STK_039	1.8	56	2	3
STK_056	1.1	0	2	3
STK_056	1.1	1	2	3
STK_056	1.4	2	2	3
STK_056	2.4	3	2	3
STK_056	4.4	4	2	3
STK_056	2.2	7	2	3
STK_056	3.2	10	2	3
STK_056	2.5	17	2	3
STK_056	3.8	23	2	3
STK_056	2.2	30	2	3
STK_056	1.9	37	2	3
STK_056	1.8	44	2	3
STK_056	2	51	2	3
STK_056	2.2	65	2	3
